# Supplementary material
Source: MDPI journal article supplement (https://www.mdpi.com/2311-7524/9/9/998)
Supplement: s1 [file s1]

### Supplementary Figure

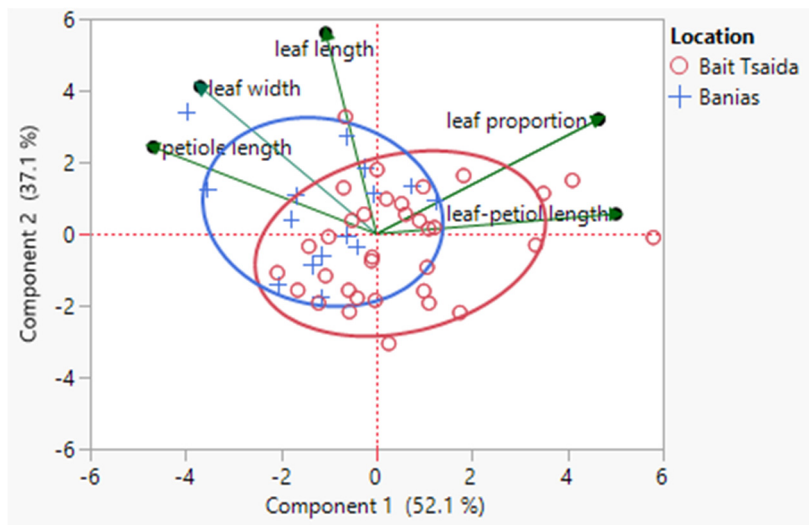

**Supplementary Figure S1.** PCA (principal component analysis) biplot analysis performed on 46 *Sylvestris* accessions, using the leaves and petioles measured data. The red and blue ellipse circles enclose those variables that fall into the same cluster, representing an 80% confidence level. The green arrows indicate eigenvectors representing the strength and direction of the trait correlation.
